# Supplementary material
Source: HighWire-hosted journal article supplement (http://www.qdcxjkg.com/highwire/filestream/129840/field_highwire_adjunct_files/1/ERJ-01973-2015_Supplement.pdf)
Supplement: ERJ-01973-2015_Supplement.pdf [file ERJ-01973-2015_Supplement.pdf]

**Collapse phenomenon during Chartis collateral ventilation assessment:  
frequency and clinical significance**

Wolfgang Gesierich MD, Konstantinos Samitas MD PhD, Frank Reichenberger MD,  
Juergen Behr MD

**ONLINE DATA SUPPLEMENT**

**Table E1.** Distribution and quantification of total defect size in single fissures or whole lobes.

|                 | <b>Complete</b> | <b>Incomplete</b> | <b>Total*</b> | <b>% of Incomplete</b> | <b>Mean Defect Size (cm<sup>2</sup>)<sup>#</sup></b> |
|-----------------|-----------------|-------------------|---------------|------------------------|------------------------------------------------------|
| <b>Fissures</b> |                 |                   |               |                        |                                                      |
| URO             | 46              | 39                | 85            | 45.9%                  | 22.5 ± 2.0                                           |
| LRO             | 75              | 10                | 85            | 11.8%                  | 9.9 ± 1.9                                            |
| RH              | 21              | 64                | 85            | 75.3%                  | 41.5 ± 2.7 <sup>†</sup>                              |
| LO              | 65              | 20                | 85            | 23.5%                  | 19.4 ± 2.6                                           |
| <b>Lobes</b>    |                 |                   |               |                        |                                                      |
| RUL             | 16              | 69                | 85            | 81.2%                  | 51.5 ± 3.2 <sup>‡</sup>                              |
| RML             | 21              | 64                | 85            | 75.3%                  | 43.3 ± 2.9 <sup>‡</sup>                              |
| RLL             | 44              | 41                | 85            | 48.2%                  | 24.3 ± 2.0                                           |
| LUL             | 65              | 20                | 85            | 23.5%                  | 20.1 ± 2.6                                           |
| LLL             | 65              | 20                | 85            | 23.5%                  | 20.1 ± 2.6                                           |

Data are presented as mean ± SEM. Statistical analysis between groups was performed by one-way ANOVA (Kruskal-Wallis). Abbreviations; URO: upper right oblique fissure, LRO: lower right oblique fissure, RH: right horizontal fissure, LO: left oblique fissure, RUL: right upper lobe, RML: right middle lobe, RLL: right lower lobe, LUL: left upper lobe, LLL: left lower lobe.

\* Fissure analysis was not possible in 7 patients due to low quality or unavailability of CT scans.

<sup>#</sup> Fissures with no gaps were excluded when measuring mean defect size values

<sup>†</sup> P < 0.001 compared to all other fissures

<sup>‡</sup> P < 0.001 compared to all other lobes

**Table E2.** Patient baseline characteristics presented in total and according to ventilation mode during Chartis assessment.

|                                                  | Total       | Spontaneous Ventilation | Jet Ventilation |
|--------------------------------------------------|-------------|-------------------------|-----------------|
| <b>Demographics</b>                              |             |                         |                 |
| Patient no                                       | 92          | 55                      | 37              |
| Age (years)                                      | 66.9 ± 6.3  | 66.7 ± 5.7              | 67.1 ± 7.1      |
| Sex (F/M)                                        | 34/58       | 19/36                   | 15/22           |
| <b>Arterial Blood Gas</b>                        |             |                         |                 |
| PaO <sub>2</sub> (mmHg)                          | 67.7 ± 14   | 67.3 ± 12.1             | 68.0 ± 16.6     |
| PaCO <sub>2</sub> (mmHg)                         | 40.9 ± 6.0  | 41.0 ± 6.6              | 40.6 ± 5.1      |
| pH                                               | 7.43 ± 0.03 | 7.43 ± 0.03             | 7.43 ± 0.02     |
| <b>Lung Function</b>                             |             |                         |                 |
| FEV <sub>1</sub> (L)                             | 0.87 ± 0.27 | 0.87 ± 0.28             | 0.89 ± 0.25     |
| FEV <sub>1</sub> % predicted                     | 32.8 ± 8.6  | 32.5 ± 9.4              | 33.5 ± 7.0      |
| VCmax (L)                                        | 2.23 ± 0.72 | 2.25 ± 0.71             | 2.20 ± 0.75     |
| VCmax % predicted                                | 63.0 ± 14.3 | 63.7 ± 15.1             | 62.0 ± 13.1     |
| FEV <sub>1</sub> /FVC                            | 43.4 ± 8.0  | 42.1 ± 8.3              | 45.7 ± 6.8      |
| DLCO (mL·min <sup>-1</sup> ·mmHg <sup>-1</sup> ) | 2.19 ± 0.90 | 2.09 ± 0.93             | 2.29 ± 0.86     |
| DLCO % predicted                                 | 25.9 ± 10.1 | 24.5 ± 10.4             | 27.5 ± 9.7      |
| RV (L)                                           | 5.98 ± 1.45 | 5.70 ± 1.45*            | 6.29 ± 1.29     |
| RV % predicted                                   | 253 ± 60    | 245 ± 56*               | 271 ± 50        |
| TLC (L)                                          | 8.16 ± 1.63 | 7.90 ± 1.62*            | 8.64 ± 1.61     |
| TLC % predicted                                  | 134 ± 23    | 129 ± 26 <sup>+</sup>   | 142 ± 17        |
| <b>Exercise performance &amp; QoL</b>            |             |                         |                 |
| 6MWT (m)                                         | 306 ± 101   | 317 ± 103               | 290 ± 98        |
| SGRQ                                             | 61 ± 14     | 61 ± 13                 | 62 ± 15         |
| <b>Chartis Outcome</b>                           |             |                         |                 |
| CV+                                              | 15          | 11                      | 4               |
| CV-                                              | 50          | 28                      | 22              |
| CP                                               | 21          | 11                      | 10              |
| Unclear                                          | 6           | 5                       | 1               |

Data are presented as mean ± SD or *n*.

\*: *p* = 0.05 vs mechanical ventilation

<sup>+</sup>: *p* = 0.001 vs mechanical ventilation

Abbreviations: FEV<sub>1</sub>: forced expiratory volume in 1 s, FVC: forced vital capacity, DLCO: diffusing capacity of lung for carbon monoxide, RV: residual volume, TLC: total lung capacity, 6MWT: six minute walking test, SGRQ: Saint-George respiratory questionnaire.
